# Supplementary material for: Bis(4-methylpiperidine-1-carbodithioato)-lead(II) and Bis(4-benzylpiperidine-1-carbodithioato)-lead(II) as Precursors for Lead Sulphide Nano Photocatalysts for the Degradation of Rhodamine B
Source: MDPI journal article supplement (doi:10.3390/molecules26237251), 2021-11-29
Supplement: s1 [file s1]

# Synthesis, Structural, Optical, and Photocatalytic Studies of PbS Nanocrystals

Thandi B. Mbuyazi and Peter A. Ajibade \*

School of Chemistry and Physics, University of KwaZulu-Natal, Private Bag X01, Scottsville, Pietermaritzburg 3209, South Africa; 216006335@stu.ukzn.ac.za

\* Correspondence: [ajibade@ukzn.ac.za](mailto:ajibade@ukzn.ac.za)

## Supplementary Materials

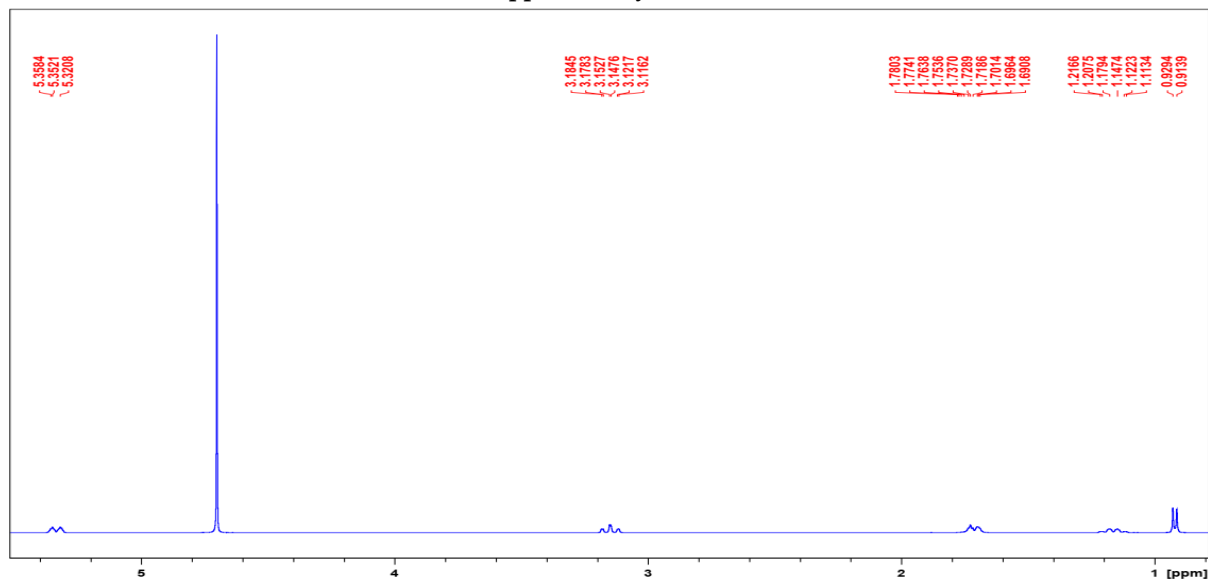

Figure S1. Proton NMR spectrum of 4-methylpiperidine dithiocarbamate

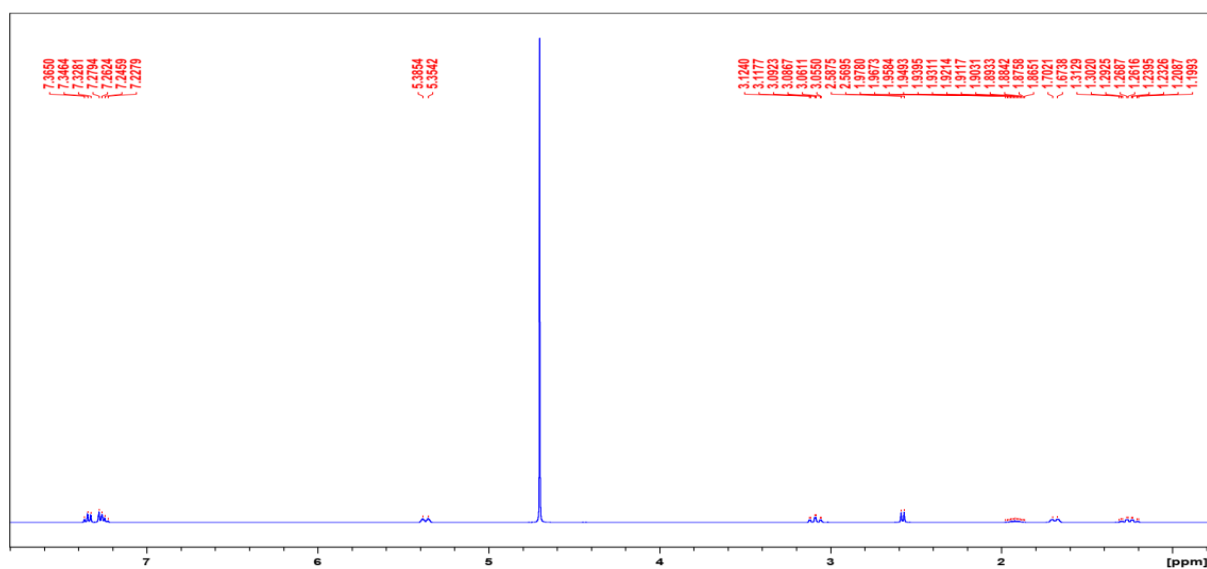

Figure S2. Proton NMR spectrum of 4-benzylpiperidine dithiocarbamate

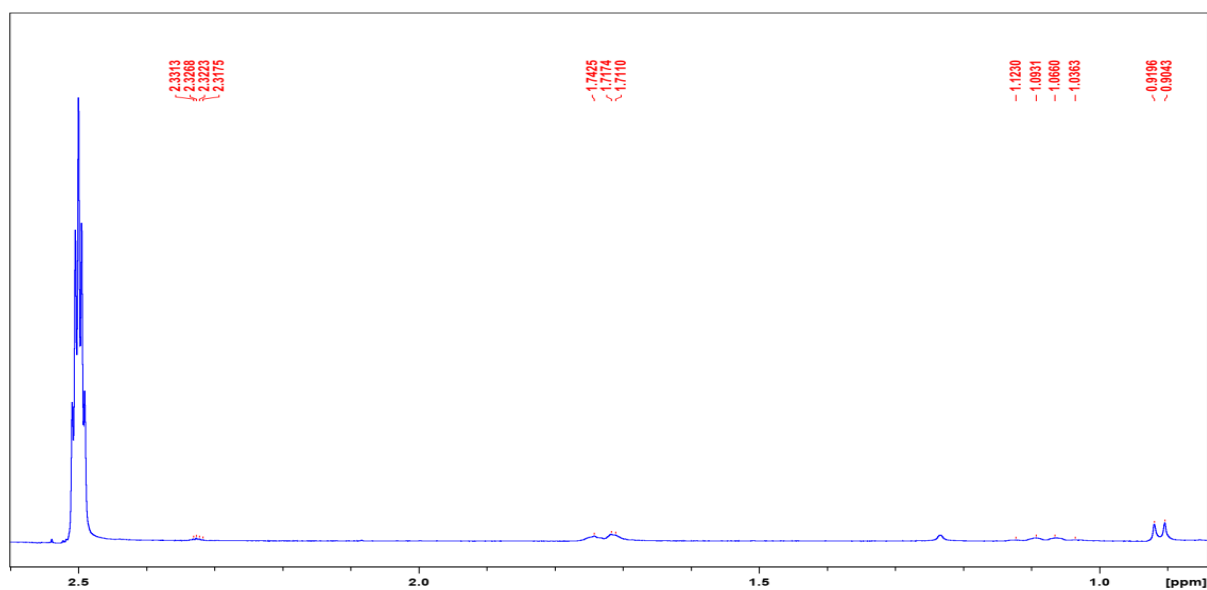

**Figure S3.** Proton NMR spectrum of bis(4-methylpiperidine-1-carbodithioato)-lead(II)

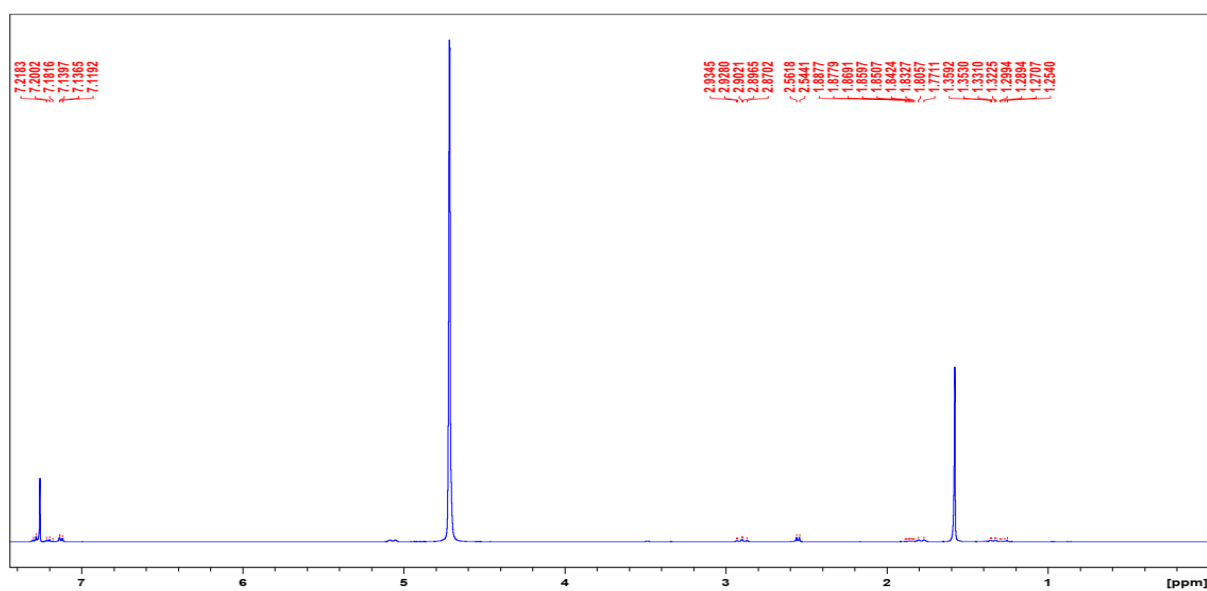

**Figure S4.** Proton NMR spectrum of bis(4-benzylpiperidine-1-carbodithioato)-lead(II)

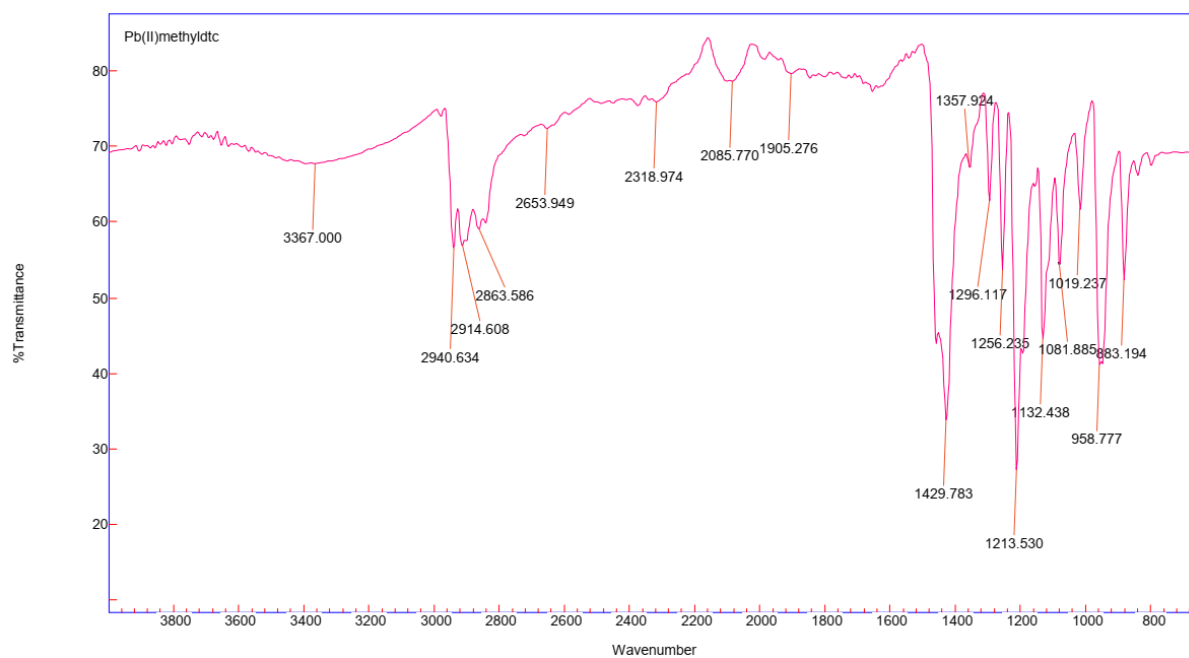

**Figure S5.** FTIR spectrum of bis(4-methylpiperidine-1-carbodithioato)-lead(II)

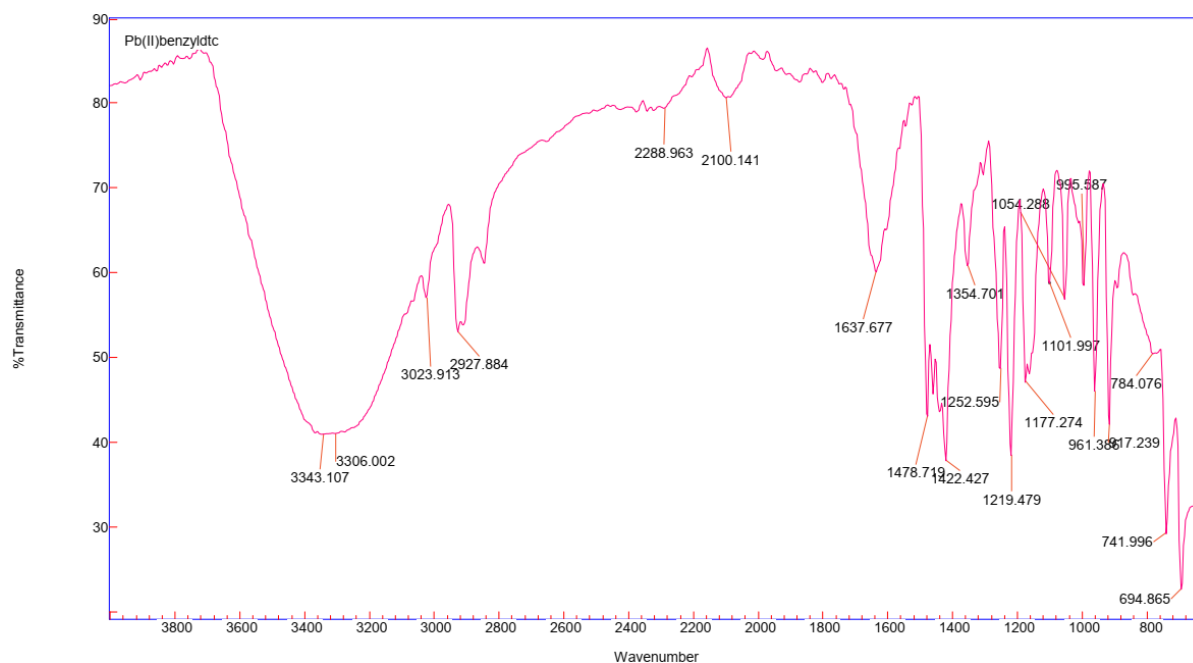

**Figure S6.** FTIR spectrum of bis(4-benzylpiperidine-1-carbodithioato)-lead(II)

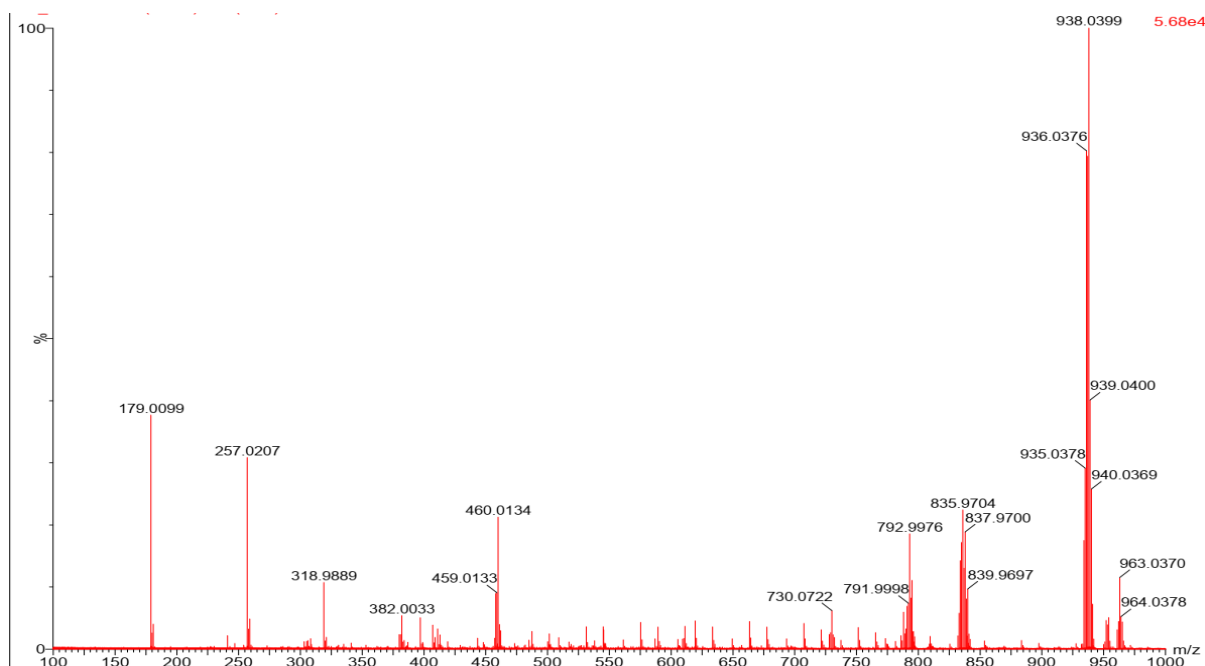

**Figure S7.** ToF mass spectrum of bis(4-methylpiperidine-1-carbodithioato)-lead(II)

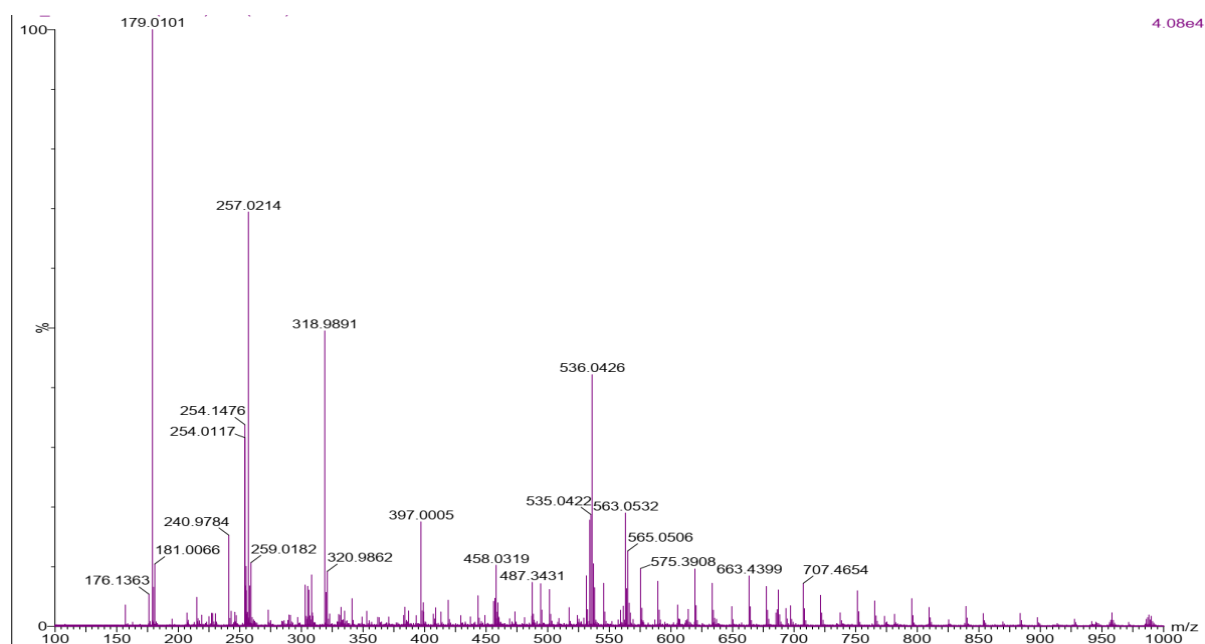

**Figure S8.** ToF mass spectrum of bis(4-benzylpiperidine-1-carbodithioato)-lead(II)

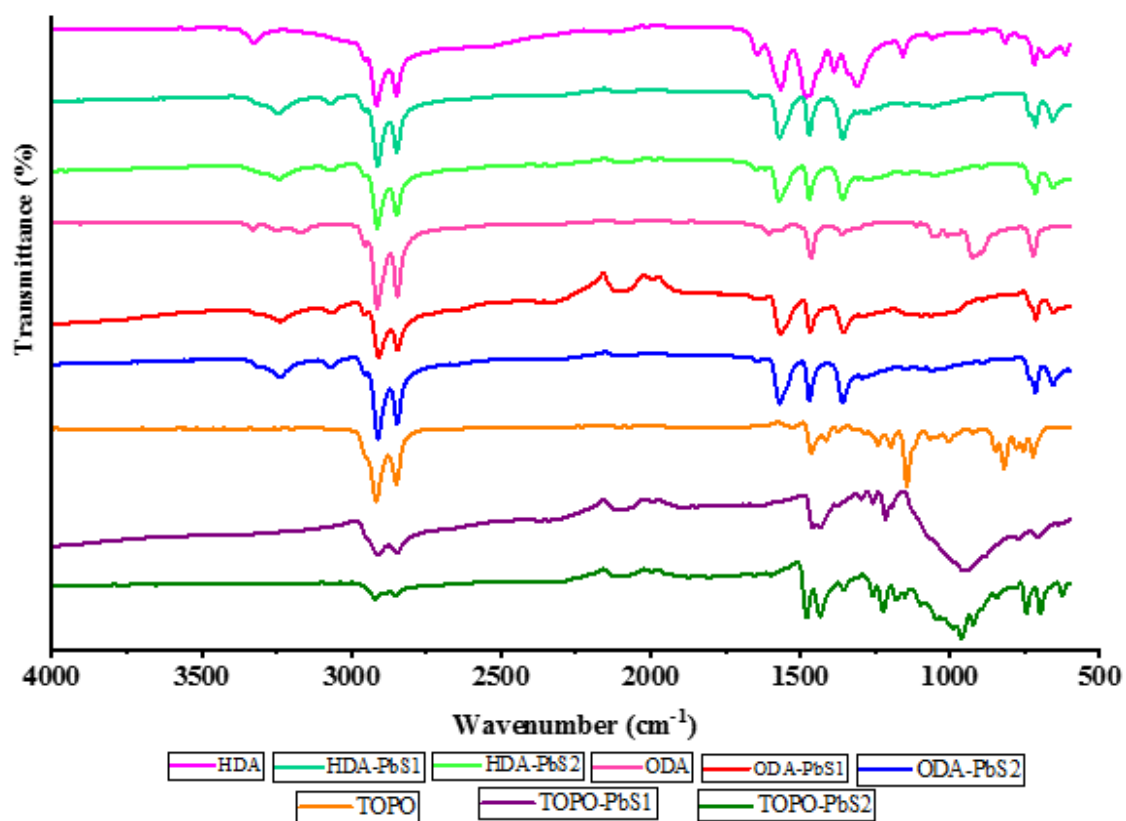

Figure S9. FTIR spectra of (HDA, ODA, and TOPO) capped as-prepared PbS nanoparticles

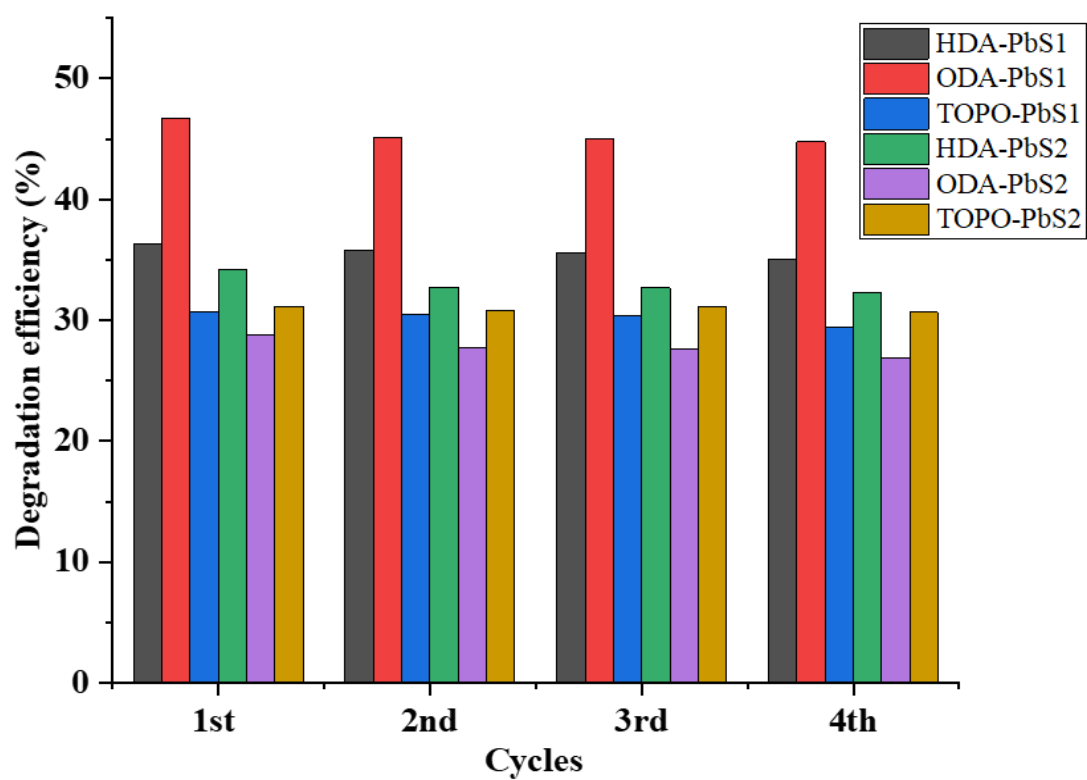

Figure S10. The reusability of PbS photocatalysts.

**Table S1.** Percentage (%) degradation for recyclability studies

|                                          | <b>HDA-<br/>PbS1</b> | <b>ODA-<br/>PbS1</b> | <b>TOPO-<br/>PbS1</b> | <b>HDA-<br/>PbS2</b> | <b>ODA-<br/>PbS2</b> | <b>TOPO-<br/>PbS2</b> |
|------------------------------------------|----------------------|----------------------|-----------------------|----------------------|----------------------|-----------------------|
| <b>1st</b>                               | 36.28                | 46.71                | 30.71                 | 34.22                | 28.70                | 31.17                 |
| <b>2nd</b>                               | 35.84                | 45.08                | 30.49                 | 32.76                | 27.75                | 30.83                 |
| <b>3rd</b>                               | 35.57                | 45.06                | 30.34                 | 32.71                | 27.64                | 31.09                 |
| <b>4th</b>                               | 35.08                | 44.78                | 29.44                 | 32.31                | 26.86                | 30.66                 |
| <b>% Change 1<sup>st</sup> &amp; 4th</b> | 1.20                 | 1.93                 | 1.27                  | 1.91                 | 1.84                 | 0.51                  |
